# Supplementary material
Source: HighWire-hosted journal article supplement (https://jnm.snmjournals.org/highwire/filestream/95552/field_highwire_adjunct_files/0/227132_Supplemental_Data.pdf)

**Supplemental Figure 1.** Examples for primary, visual image quality at reduced acquisition times for patients #4 and #25 (as in Figure 5). Top rows: AD, bottom rows: FTD. Images are normalized to global FDG uptake in the brain.

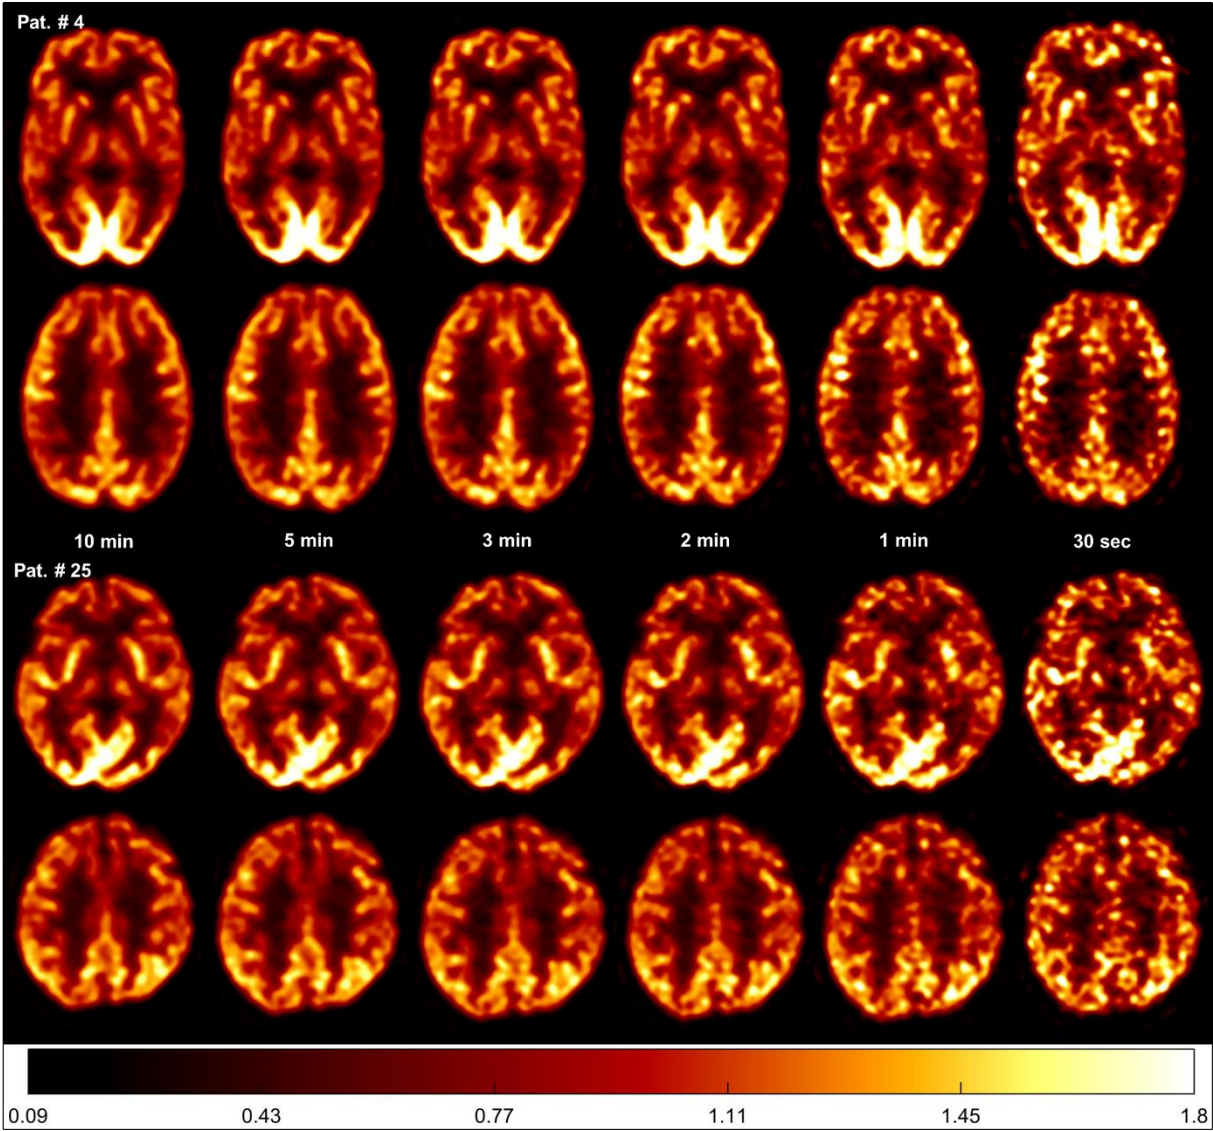

Supplement: 227132_Supplemental_Data.pdf [file 227132_Supplemental_Data.pdf]
